# Supplementary material for: Comparison of Widefield OCT Angiography Features Between Severe Non-Proliferative and Proliferative Diabetic Retinopathy
Source: Springer Nature journal article supplement (doi:10.1007/s40123-024-00886-2), 2024-01-25
Supplement: MOESM1 [file 26662254]

# Comparison of Widefield OCT angiography features between severe non-proliferative and proliferative diabetic retinopathy

## Authors

Dr Ines Drira, MD, ORCID 0000-0001-5858-326X, Manchester University, Manchester Royal Eye Hospital, Oxford Rd, Manchester M13 9WL, United Kingdom, and Hospital of Toulouse, Pl. du Dr Joseph Baylac, 31300 Toulouse, France, Drira.i@chu-toulouse.fr

Dr Maha Noor, MD, ORCID 0000-0002-1486-469X, Manchester University, Manchester Royal Eye Hospital, Oxford Rd, Manchester M13 9WL, United Kingdom, Maha.Noor@doctors.org.uk

Dr Amy Stone, MD, Manchester University, Manchester Royal Eye Hospital, Oxford Rd, Manchester M13 9WL, United Kingdom, Amy.Stone@mft.nhs.uk

Dr Yvonne D'Souza, MD, Manchester University, Manchester Royal Eye Hospital, Oxford Rd, Manchester M13 9WL, United Kingdom, Yvonne.D'Souza@mft.nhs.uk

Dr Binu John, MD, Manchester University, Manchester Royal Eye Hospital, Oxford Rd, Manchester M13 9WL, United Kingdom, Binu.John@mft.nhs.uk

Dr Orlaith McGrath, MD, ORCID 0000-0002-4302-7081, Manchester University, Manchester Royal Eye Hospital, Oxford Rd, Manchester M13 9WL, United Kingdom, Orlaith.Mcgrath123@gmail.com

Dr Praveen J. Patel, MD, ORCID 0000-0001-8682-4067, National Institute for Health and Care Research Biomedical Research Centre, Moorfields Eye Hospital National Health Service Foundation Trust and University College London Institute of Ophthalmology, London, United Kingdom, Praveen.Patel1@nhs.net

Pr Tariq Aslam, MD, PhD, ORCID 0000-0002-9739-7280, Manchester University, Manchester Royal Eye Hospital, Oxford Rd, Manchester M13 9WL, United Kingdom, Tariq.Aslam@mft.nhs.uk

Corresponding authors:

Dr Ines Drira and Pr Tariq Aslam.

## Supplementary material 1 – Algorithmic steps

We extracted for each eye a full version and a binarized version of each the 4x4 and the 10x10 images.

We originally had the software analyse a cropped central 4x4mm section of the macula from the 10x10mm image to analyse the FAZ. However, we noted that the separate 4x4mm image was of higher quality, so we used both sizes for our analysis.

First, we had the software analyse the patient's 10x10mm image in binary and complete forms. Then we also analysed the 4x4mm binary image and its full image. The semiautomatic approach was used to define the centre of the fovea on both 4x4 and 10x10mm images. The optic disc area and eventual artefacts were manually segmented and excluded for qualitative analysis.

We analysed four main characteristics of the images:

- **Average Percentage of Skeletonised Capillary Vessels:** extent of the smaller capillary vessel network that covers the retina, excluding areas taken up by larger vessels and the FAZ after binarization and skeletonisation.
- **Mean Capillary Intensity:** capillary blood flow assessment by measuring the intensity of the small vessel/capillary pixels. We analysed the capillary vasculature's mean intensity (brightness scale: 0-black to 255-white) on the 10x10mm image. We also calculated the percentage of capillaries and the percentage of skeletonised capillaries from the 10x10mm image. Finally, we calculated the number (if any) of ischemic areas and the mean of the ischemic areas. We applied the threshold to remove low-intensity areas and applied morphological reconstruction (the area around the ischemic area). All intensity values described in this article are defined by average intensity of pixel values of the entity analysed.
- **FAZ (Foveal avascular area),** and ischemic areas around the FAZ, the periFAZ (1/4mm out from the FAZ) and the paraFAZ (1/4mm out from the periFAZ) on the 4x4mm image. We calculated the vessel ratio and vessel intensity of the periFAZ and the paraFAZ. We also calculated the area of the FAZ and the circularity (perimetry) of the FAZ.
- **Mean Vessel Intensity:** represents the average intensity of the larger segmented vessels. this measure is the only discrete indicator of the status of the larger vessels in our study of 10x10 and 4x4mm images. It allows for some form of representation of all clinically recognisable anatomic features in resulting algorithms.

## Supplementary material 2

### Sample size calculation

We calculated sample size for this study for key metric mean capillary intensity. Mean capillary intensity of a normal patient from a previous study was 98.69, with  $\sigma = 6.23$  difference in Normal (group 1) versus Diabetic with retinopathy (group 2) suggests clinically important difference in this metric of 5. Using sample size calculation, we obtained a result of 24. Our objective of recruitment was then 25 patients in each group minimum.

$$k = \frac{n_2}{n_1} = 1$$

$$n_1 = \frac{(\sigma_1^2 + \frac{\sigma_2^2}{k})(z_{1-\frac{\alpha}{2}} + z_{1-\beta})^2}{\Delta^2} = \frac{(6.23^2 + \frac{6.23^2}{1})(1.96 + 0.84)^2}{5^2}$$

$$n_1 = 24$$

$$n_2 = k * n_1 = 24$$

Where:

$\Delta = |\mu_2 - \mu_1|$  = absolute difference between two means

$\sigma_1, \sigma_2$  = variance of mean of group 1 and 2

$n_1$  = sample size for group 1

$n_2$  = sample size for group 2

$\alpha$  = probability of type I error (0.05)

$\beta$  = probability of type II error (0.2)

$z$  = critical Z value for a given  $\alpha$  or  $\beta$

$k$  = ratio of sample size for group 2 to group 1

## Manual analysis for software validation

We performed manual segmentation with the MATLAB software on the ultra-widefield OCTAs. Artefacts were cropped and disc area segmented. Ischemic areas were segmented between second orders vessels. Segmentation was performed by a research fellow with more than five years of experience in Ophthalmology (Figure 1-S2).

For each image we calculated the disc area and the area of total image in disc areas. For neovascularization and ischemia assessment, we calculated the number of zones, average zone area in disc area, and the average distance from the optic disc. We also calculated the average intensity of ischemic areas and the mean intensity of a control vessel.

We first present here the analysis including all the mosaic images we obtained: Tables 1 and 2 show the baseline characteristics of the groups and Table 3 shows the metrics obtained.

Secondly, we present the results of the manual analysis only for patients who had good enough quality imaging to be included in the semi-automated mosaic analysis: the baselines characteristics are presented in the main article and Table 4 shows the metrics obtained.

|                       | Group         | N  | Mean | Median | SD   | Minimum | Maximum | Shapiro-Wilk |        | Tests          |           |    |              |
|-----------------------|---------------|----|------|--------|------|---------|---------|--------------|--------|----------------|-----------|----|--------------|
|                       |               |    |      |        |      |         |         | W            | p      | Test           | Statistic | df | p            |
| Age                   | Proliferative | 16 | 55.7 | 62     | 18.4 | 23      | 80      | 0.92         | 0.169  | Student's t    | 0.455     | 49 | 0.651        |
|                       | Severe        | 35 | 53.5 | 55     | 15.2 | 21      | 87      | 0.975        | 0.59   |                |           |    |              |
| Duration of diabetes  | Proliferative | 11 | 18.7 | 18     | 5.5  | 10      | 25      | 0.899        | 0.18   | Student's t    | 0.622     | 41 | 0.538        |
|                       | Severe        | 32 | 16.9 | 15     | 9.1  | 1       | 43      | 0.938        | 0.066  |                |           |    |              |
| HbA1c (last 4 months) | Proliferative | 7  | 85.7 | 86     | 15.0 | 64      | 110     | 0.982        | 0.969  | Student's t    | 0.542     | 19 | 0.594        |
|                       | Severe        | 14 | 80.1 | 74     | 25.2 | 44      | 140     | 0.926        | 0.272  |                |           |    |              |
| BCVA                  | Proliferative | 15 | 0.4  | 0.2    | 0.2  | 0.02    | 0.7     | 0.882        | 0.051  | Mann-Whitney U | 124       |    | <b>0.003</b> |
|                       | Severe        | 35 | 0.2  | 0.1    | 0.2  | -0.2    | 0.8     | 0.879        | 0.001  |                |           |    |              |
| 4x4 quality           | Proliferative | 16 | 5.8  | 6      | 1.2  | 3       | 8       | 0.923        | 0.191  | Mann-Whitney U | 196.5     |    | 0.076        |
|                       | Severe        | 35 | 6.4  | 6      | 0.9  | 5       | 8       | 0.873        | < .001 |                |           |    |              |
| 10x10 quality         | Proliferative | 16 | 6.3  | 6.5    | 1.1  | 4       | 8       | 0.919        | 0.161  | Mann-Whitney U | 196       |    | 0.073        |
|                       | Severe        | 35 | 6.9  | 7      | 0.9  | 5       | 8       | 0.859        | < .001 |                |           |    |              |

Table 1: Further description of qualitative patients' characteristics and analysis – Ultra-widefield (N: Number of patients; SD: Standard deviation)

|                                          |         | Type          |            |            | χ <sup>2</sup> Tests |    |             |
|------------------------------------------|---------|---------------|------------|------------|----------------------|----|-------------|
|                                          |         | Proliferative | Severe     | Total      | Value                | df | p           |
| Gender                                   | F       | 9 (56.3%)     | 7 (20%)    | 16 (31.4%) | 6.7                  | 1  | <b>0.01</b> |
|                                          | M       | 7 (43.8%)     | 28 (80%)   | 35 (68.6%) |                      |    |             |
|                                          | Total   | 16 (100%)     | 35 (100%)  | 51 (100%)  |                      |    |             |
| Type of diabetes (1/2/O)                 | 1       | 5 (33.3%)     | 10 (28.6%) | 15 (30%)   | 0.113                | 1  | 0.736       |
|                                          | 2       | 10 (66.7%)    | 25 (71.4%) | 35 (70%)   |                      |    |             |
|                                          | Total   | 15 (100%)     | 35 (100%)  | 50 (100%)  |                      |    |             |
| Associated cardiovascular disease        | No      | 5 (31.3%)     | 9 (25.7%)  | 14 (27.5%) | 2.68                 | 2  | 0.262       |
|                                          | Yes     | 5 (31.3%)     | 19 (54.3%) | 24 (47.1%) |                      |    |             |
|                                          | Unknown | 6 (37.5%)     | 7 (20%)    | 13 (25.5%) |                      |    |             |
| Confounders (cataract, media opacity...) | No      | 12 (75%)      | 30 (85.7%) | 42 (82.4%) | 0.867                | 1  | 0.352       |
|                                          | Yes     | 4 (25%)       | 5 (14.3%)  | 9 (17.6%)  |                      |    |             |
|                                          | Total   | 16 (100%)     | 35 (100%)  | 51 (100%)  |                      |    |             |

Table 2: Epidemiological description of patients' and scans' characteristics and analysis – Ultra-widefield

|                                                                         | Group                | N  | Descriptives |         |        | Shapiro-Wilk |              | Independent Samples Test |        |              |       |
|-------------------------------------------------------------------------|----------------------|----|--------------|---------|--------|--------------|--------------|--------------------------|--------|--------------|-------|
|                                                                         |                      |    | Mean         | Median  | SD     | W            | p            | Statistic                | df     | p-value      |       |
| <i>Area of total image in disc areas</i>                                | <i>Proliferative</i> | 15 | 90.8         | 89.8    | 16.2   | 0.963        | 0.738        | Mann-Whitney<br>U        | 163    | 0.638        |       |
|                                                                         | <i>Severe</i>        | 24 | 96.4         | 90.1    | 23.8   | 0.898        | <b>0.019</b> |                          |        |              |       |
| <i>Disc area (DA) in pixels</i>                                         | <i>Proliferative</i> | 14 | 21969.4      | 21236.5 | 3209.1 | 0.939        | 0.404        | Student's t              | 0.313  | 36.0         | 0.756 |
|                                                                         | <i>Severe</i>        | 24 | 21570.9      | 21274.5 | 4074.7 | 0.982        | 0.929        |                          |        |              |       |
| <i>Mean Intensity Vessel Control</i>                                    | <i>Proliferative</i> | 15 | 243.6        | 244.1   | 4.9    | 0.939        | 0.365        | Student's t              | -1.097 | 37.0         | 0.280 |
|                                                                         | <i>Severe</i>        | 24 | 245.1        | 245.7   | 3.9    | 0.918        | 0.053        |                          |        |              |       |
| <b>Number of ischemic zones</b>                                         | <i>Proliferative</i> | 15 | 9.5          | 8.0     | 5.5    | 0.872        | 0.036        | Mann-Whitney<br>U        | 37.0   | < .001       |       |
|                                                                         | <i>Severe</i>        | 24 | 3.1          | 3.0     | 2.4    | 0.929        | 0.092        |                          |        |              |       |
| <b>Average area of ischemic zones (DA)</b>                              | <i>Proliferative</i> | 15 | 1.3          | 1.1     | 1.0    | 0.895        | 0.080        | Mann-Whitney<br>U        | 91.0   | <b>0.033</b> |       |
|                                                                         | <i>Severe</i>        | 21 | 0.7          | 0.5     | 0.6    | 0.869        | <b>0.009</b> |                          |        |              |       |
| <b>Average distance ischemic zone from disc (in disc diameter (DD))</b> | <i>Proliferative</i> | 15 | 4.5          | 4.4     | 1.0    | 0.962        | 0.720        | Student's t              | 1.892  | 34.0         | 0.067 |
|                                                                         | <i>Severe</i>        | 22 | 3.8          | 3.7     | 1.1    | 0.941        | 0.204        |                          |        |              |       |
| <b>Average intensity of ischemic areas (DA)</b>                         | <i>Proliferative</i> | 15 | 75.7         | 71.6    | 14.8   | 0.951        | 0.536        | Student's t              | 2.189  | 34.0         | 0.036 |
|                                                                         | <i>Severe</i>        | 21 | 67.0         | 67.3    | 8.9    | 0.945        | 0.278        |                          |        |              |       |
| <b>Number of neovascular zones</b>                                      | <i>Proliferative</i> | 15 | 1.9          | 1.0     | 1.3    |              |              |                          |        |              |       |
| <b>Average neovascular zones area (DA)</b>                              | <i>Proliferative</i> | 15 | 0.4          | 0.1     | 1.0    |              |              |                          |        |              |       |
| <b>Average neovascular zones distance from disc (DD)</b>                | <i>Proliferative</i> | 15 | 3.7          | 3.6     | 0.9    |              |              |                          |        |              |       |

Table 3: Description and statistical analysis of the metrics obtained – Ultra-widefield manual segmentation (N: Number of patients; SD: Standard deviation)

## Figure legends

*Figure 1- S2 : Examples of ultra-widefield image segmentation; On the left the original image and on the right the manually segmented image*

| Group Descriptives                              |               |    |        |        |        | Shapiro-Wilk |       | Statistical tests |                 |           |    |         |
|-------------------------------------------------|---------------|----|--------|--------|--------|--------------|-------|-------------------|-----------------|-----------|----|---------|
|                                                 | type          | N  | Mean   | Median | SD     | W            | p     | Test              | H <sub>a</sub>  | Statistic | df | p-value |
| Mean vessel intensity                           | Proliferative | 27 | 223.1  | 222.8  | 3.7    | 0.955        | 0.276 | Student's t       | $\mu_P < \mu_S$ | -1.6607   | 71 | 0.051   |
|                                                 | Severe        | 46 | 224.4  | 224.1  | 2.8    | 0.979        | 0.58  |                   |                 |           |    |         |
| Mean capillaries intensity                      | Proliferative | 26 | 131.4  | 130.7  | 5.4    | 0.979        | 0.847 | Student's t       | $\mu_P < \mu_S$ | 0.547     | 66 | 0.707   |
|                                                 | Severe        | 42 | 130.7  | 130.5  | 5.0    | 0.973        | 0.4   |                   |                 |           |    |         |
| Density of capillaries                          | Proliferative | 28 | 42.5   | 42.7   | 2.6    | 0.947        | 0.168 | Student's t       | $\mu_P < \mu_S$ | -0.1347   | 73 | 0.447   |
|                                                 | Severe        | 47 | 42.6   | 43.0   | 2.3    | 0.973        | 0.337 |                   |                 |           |    |         |
| Density of skeletonised capillaries             | Proliferative | 28 | 8.4    | 8.4    | 0.6    | 0.958        | 0.308 | Student's t       | $\mu_P < \mu_S$ | -0.616    | 73 | 0.27    |
|                                                 | Severe        | 47 | 8.4    | 8.5    | 0.6    | 0.973        | 0.333 |                   |                 |           |    |         |
| Density of capillaries in peri FAZ              | Proliferative | 28 | 31.7   | 31.2   | 4.7    | 0.987        | 0.973 | Student's t       | $\mu_P < \mu_S$ | -0.5365   | 73 | 0.297   |
|                                                 | Severe        | 47 | 31.9   | 32.4   | 5.8    | 0.96         | 0.107 |                   |                 |           |    |         |
| Density of skeletonised capillaries in peri FAZ | Proliferative | 28 | 7.9    | 7.8    | 1.2    | 0.982        | 0.885 | Student's t       | $\mu_P < \mu_S$ | -0.7762   | 72 | 0.22    |
|                                                 | Severe        | 46 | 8.2    | 8.1    | 1.4    | 0.989        | 0.936 |                   |                 |           |    |         |
| Intensity of capillaries in peri FAZ            | Proliferative | 27 | 95.8   | 94.7   | 16.8   | 0.966        | 0.516 | Student's t       | $\mu_P < \mu_S$ | -1.3592   | 70 | 0.089   |
|                                                 | Severe        | 47 | 100.4  | 99.2   | 13.8   | 0.987        | 0.874 |                   |                 |           |    |         |
| Density of capillaries in para FAZ              | Proliferative | 28 | 35.8   | 36.0   | 3.0    | 0.966        | 0.467 | Student's t       | $\mu_P < \mu_S$ | -1.2503   | 72 | 0.108   |
|                                                 | Severe        | 46 | 36.7   | 36.3   | 3.0    | 0.978        | 0.509 |                   |                 |           |    |         |
| Density of skeletonised capillaries in para FAZ | Proliferative | 28 | 8.8    | 8.8    | 0.8    | 0.963        | 0.403 | Student's t       | $\mu_P < \mu_S$ | -0.9053   | 72 | 0.184   |
|                                                 | Severe        | 46 | 9.0    | 8.8    | 0.9    | 0.953        | 0.06  |                   |                 |           |    |         |
| Intensity of capillaries in para FAZ            | Proliferative | 25 | 120.5  | 119.9  | 10.2   | 0.923        | 0.06  | Student's t       | $\mu_P < \mu_S$ | -1.2714   | 69 | 0.104   |
|                                                 | Severe        | 46 | 123.4  | 122.8  | 8.8    | 0.988        | 0.917 |                   |                 |           |    |         |
| Density of capillaries in the 4x4mm image       | Proliferative | 28 | 39.2   | 39.5   | 1.8    | 0.952        | 0.219 | Student's t       | $\mu_P < \mu_S$ | -0.4573   | 71 | 0.324   |
|                                                 | Severe        | 45 | 39.4   | 39.6   | 1.8    | 0.984        | 0.791 |                   |                 |           |    |         |
| Intensity of capillaries in the 4x4mm image     | Proliferative | 26 | 134.7  | 136.2  | 7.4    | 0.655        | <.001 | Mann-Whitney U    | $\mu_P < \mu_S$ | 593       |    | 0.479   |
|                                                 | Severe        | 46 | 135.6  | 135.9  | 4.8    | 0.976        | 0.437 |                   |                 |           |    |         |
| Total areas of ischemia                         | Proliferative | 26 | 810.4  | 391.5  | 1497.4 | 0.555        | <.001 | Mann-Whitney U    | $\mu_P > \mu_S$ | 596       |    | 0.512   |
|                                                 | Severe        | 46 | 1467.0 | 332.5  | 3250.5 | 0.492        | <.001 |                   |                 |           |    |         |



|                                 |               |    |        |        |       |       |       |                |                 |     |       |
|---------------------------------|---------------|----|--------|--------|-------|-------|-------|----------------|-----------------|-----|-------|
| <b>Number of ischemic areas</b> | Proliferative | 28 | 2.7    | 1      | 5.0   | 0.544 | <.001 | Mann-Whitney U | $\mu_P > \mu_S$ | 642 | 0.428 |
|                                 | Severe        | 47 | 2.6    | 1      | 4.0   | 0.699 | <.001 |                |                 |     |       |
| <b>Area of FAZ</b>              | Proliferative | 28 | 1847.2 | 1713   | 342.0 | 0.48  | <.001 | Mann-Whitney U | $\mu_P > \mu_S$ | 510 | 0.94  |
|                                 | Severe        | 46 | 1931.9 | 1749.5 | 479.1 | 0.506 | <.001 |                |                 |     |       |
| <b>Perimeter of FAZ</b>         | Proliferative | 28 | 0.9    | 1.0    | 0.2   | 0.637 | <.001 | Mann-Whitney U | $\mu_P > \mu_S$ | 524 | 0.084 |
|                                 | Severe        | 46 | 0.9    | 1.0    | 0.2   | 0.721 | <.001 |                |                 |     |       |

Supplementary material 3 – Full analysis 4x4 and 10x10mm images (N: Number of patients; SD: Standard deviation; FAZ: Foveal avascular zone)
